# Supplementary material
Source: Springer Nature journal article supplement (https://www.springermedizin.de/resource/supplementary/12955_2014_1338_MOESM2_ESM.pdf/9559416)

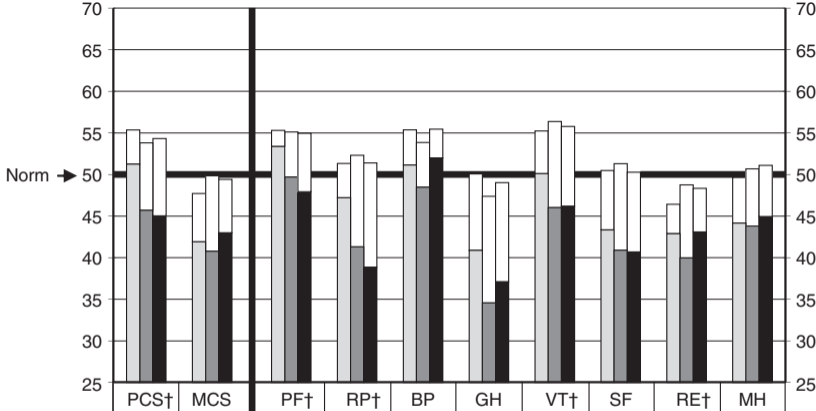

|                                       |     |      |     |      |       |     |      |       |      |      |     |
|---------------------------------------|-----|------|-----|------|-------|-----|------|-------|------|------|-----|
| □ Differences compared with controls* | CHB | 4.1  | 5.8 | 1.9  | 4.1   | 4.2 | 9.2  | 5.1   | 7.1  | 3.5  | 5.5 |
|                                       | CC  | 8.1‡ | 9.1 | 5.4‡ | 11.0‡ | 5.4 | 12.8 | 10.3‡ | 10.4 | 8.8‡ | 6.9 |
|                                       | DCC | 9.3‡ | 6.4 | 7.0‡ | 12.5‡ | 3.5 | 11.9 | 9.6‡  | 9.6  | 5.2  | 6.2 |

Supplement: MOESM2 [file 9559416]
